# Supplementary material
Source: publisher figshare collection journal article supplement (https://gsajournals.figshare.com/ndownloader/files/27678693)
Supplement: Supplementary file 1 [file 27678693]

## Sheet: Increased Func. + Localiz. CA2
Supplemental File S8
CA2 increased annotated Brachypodium PM protein dataset
																			NA					CA 2 days					CA 4 days					CA 6 days					CA 8 days
Bradi no.	Anova (p)	Adjusted (p)	Dunnet's (CA2)	Dunnet's (CA4)	Dunnet's (CA6)	Dunnet's (CA8)	Max fold change (/NA)	Min fold change (/NA)	Fold change (CA2/NA)	Fold change (CA4/NA)	Fold change (CA6/NA)	Fold change (CA8/NA)	Peptide Sequence	Description	Species	Category	PM Prediction (Y/N)	Predicted Localization	Experiment1	Experiment2	Experiment3	Experiment4	Average	Experiment1	Experiment2	Experiment3	Experiment4	Average	Experiment1	Experiment2	Experiment3	Experiment4	Average	Experiment1	Experiment2	Experiment3	Experiment4	Average	Experiment1	Experiment2	Experiment3	Experiment4	Average
Bradi1g03760.1	1.76065e-07	2.01282e-06	1.2728e-06	6.12862e-08	2.75984e-06	1.1188e-05	14.0802	9.1758	10.3213	14.0802	10.1951	9.1758	MANATSGVSVAEECVKAFQELRTGRAHRFVVYKVNNTDADESAAEQVVVDKVGGRDAAFEDLVAALPADDCRYAVYDLDFTVAAATAAHADGEAPRSKIFFISWSPETAEVRSKMVYASSNEGFKKELDGTQIDVQATDPSELTLQILKDLAA	actin-depolymerizing factor 3-like	Brachypodium distachyon	cell structure	N	extracellular matrix	8899.02	10361.3	11054.2	11025.3	10335	105551	129973	91988.2	99166.9	106670	110491	172817	135815	162949	145518	99703.3	117018	91549.6	113193	105366	76626.1	104419	91017.8	107263	94831.6
Bradi1g07170.1	1.78303e-05	6.81389e-05	0.000656651	0.0719924	0.000469304	0.362646	1.61379	0.808315	1.59645	1.30922	1.61379	0.808315	MHPDATSPSHRIARVAAHLNPLTPPRPQMEEAGLRPVACRAKGAAPGFKVAVLGAAGGIGQSLSLLMKMNPLVSVLHLYDVVNTPGVTADVSHMDTTAVVRGFLGQQQLEAALTGMDLVIIPAGLPRKPGMTRDDLFNKNAGIVRSLCEGIAKCCPNAIVNLISNPVNSTVPVAAEVFKRAGTYCPKRLLGVTTLDVARANTFVAEVLGVDPRDVSVPVVGGHAGVTILPLLSQVSPPCSFTADEISYLTNRIQNGGTEVVEAKAGAGSATLSMAFAAAKFADACLRGMRGDAGIVECSYVASEVRELPFFATKVRLGRGGAEEILPLGPLNDFERAGLEMAKKELAESIQKGVAFMNK	Malate Dehydrogenase	Brachypodium distachyon	energy	N	multiple localizations	69309	74758.5	85067	103761	83223.8	112284	138395	152855	127915	132862	122506	120221	109109	83998.6	108959	137365	134171	132902	132787	134306	68613.5	86419.3	57171.9	56879.5	67271.1
Bradi1g13232.1	0.000442962	0.00103563	0.0023319	8.20347e-05	0.0062821	0.00904279	2.82343	2.08508	2.28961	2.82343	2.13971	2.08508	MAGSRQLAVAALLLVAAAGVCTRLPPAGALGVNWGTMASHQLPPSSVVRMLQDNGIKKVKLFDADAGPLEALAGSGIEVMVAIPNIMLDMMTDYDTARDWVHKNVSAYNFDGGVNIKYVAVGNEPFLSSLNGTFLNVTFPALQNIQRALNEAGVGDTVKATVPLNADVYESPKDNPVPSAGRFRAEISGLMTEIVQFLNQSGAPFTVNIYPYLSLYGNAGFPLDFAFFDGTTSPVVDTNSGISYTNVFDANFDTLVSALNAAGVGGLPVMVGEVGWPTDGDKQATAAYAQRFYAGLLKKLASNAGTPLRANQYVEVYLFSLIDEDVKSVAPGNFERHWGIMRYDGQPKYAMDLTGQGRNTALVGARGVEYLPRAWCVLNANAPAESMSRLGDNVDYACS…	glucan endo-1,3-beta-glucosidase 8-like	Brachypodium distachyon	cell structure	Y	PM	16712.1	23064.4	29220.6	26658.9	23914	69633.2	50433.4	46012.9	52935.6	54753.8	63816.4	66512.2	69032	70717.1	67519.4	72823	51323.7	40295.1	40233.9	51168.9	57980.4	32520.2	52214.8	56735.3	49862.7
Bradi1g21310.1	1.3621e-06	9.6203e-06	0.0337667	6.85293e-07	0.0482238	4.59657e-05	2.9351	1.56703	1.60514	2.9351	1.56703	2.26935	MERYEVIKDLGSGNFGVAKLVRDVRTKELFAVKFIERGHKIDENVQREIMNHRSLRHPNIVRFKETYAKMSWLKLHPQVVLTPTHLAIVMEYAAGGELFERICSTGRFSENEARFFFQQLLSGVSYCHSMQICHRDLKLENTLLDGSEAPRLKICDFGYSKSSVLHSQPKSTVGTPAYIAPEVLSRREYDGKVADVWSCGVTLYVMLVGAYPFEDPVEPKNFRKTITRILSVQYAVPDYVRISMECRHLLSRIFVANPEQRITIPEIKNHPWFLKNLPIEMTDEYQLRLQMVGINAPSQTLEDSMAIIQEARKPGDGSKFAGQLCVPGLGSMELDDIDADDIDVEDSGDFVCAL	serine/threonine-protein kinase SAPK2-like isoform 2	Brachypodium distachyon	signal transduction	N	nucleus	2508.54	3166.45	2869.76	2675.96	2805.18	4683.37	4492.55	4158.46	4676.39	4502.69	9394.53	7750.46	6603.54	9185.43	8233.49	5221.78	4722.58	4029.01	3609.85	4395.8	5556.33	7313.88	7127.94	5465.51	6365.92
Bradi1g29000.1	0.0165351	0.024378	0.0205476	0.520948	0.00837111	0.239179	1.79021	1.28287	1.69441	1.28287	1.79021	1.4024	MASTNMASATSRFMLAAGAVPSGGVGSSNRVSFVPSSNRLGRKLVARAEEEPAAPAPTPAAAPETAEGAVATKEPAKAKPPPIGPKRGAKVKILRRESYWYNGTGSVVTVDQDPNTRYPVVVRFAKVNYAGVSTNNYALDEIKEV	photosystem I reaction center subunit IV, chloroplastic-like	Brachypodium distachyon	energy	N	chloroplast	20240	15810	17715.7	17599.3	17841.3	35183	24513.7	34546.3	26678.8	30230.4	18838.1	24595.9	21269.9	26848.5	22888.1	37412.7	43214.6	23720.1	23410.8	31939.6	28162.3	25330.8	24799	21790.4	25020.6
Bradi1g32770.1	1.72082e-06	1.16069e-05	0.000239697	5.0187e-08	0.121525	0.283303	32.8585	7.19108	20.3819	32.8585	9.00884	7.19108	MSVVGFDVGNDTLVAAAARQRGIDVLLNAESKRESPAAVAFAHNARLLGPHAAGAASSHAPFSSPKRLLLLAARPALVPRDLPRLPFPVHVPADGDALVHVDHIGRRIALSPTHLLAMLLAYLKQLAEADLEAPVADCVISVPCYFTQAHRRAYLDAAAVAGLTPLRLMHDLAATALGYGLYRSDLGVAGSPTFVAFVDVGHSDTQATVVAFDPSGMKVLSHGFDADLGGRDFDEVLFEHFAEEFRDRYKIDVVGNVKASMRLRAACEKAKKVLSANAEAVVNIECLMEEKDVRGMIRREEFEKLCSQLLERVVEPCKRAMADSGVGLEKLQSVELVGSGSRVPAIARVLAEFFRREPSRTINVSECVARGCALQCAMLSPTLRVREYEVQDAIPASIG…	97 kDa heat shock protein-like (LOW QUALITY PROTEIN)	Brachypodium distachyon	protein destination and storage	N	nucleus	536.973	261.473	0	0	199.611	5682.33	3451.04	3092.19	4048.28	4068.46	5925.66	6597.36	6304.35	7408.33	6558.93	1757.66	584.175	3459.61	1391.62	1798.27	581.299	0	2736.35	2424.04	1435.42
Bradi1g45910.1	2.07325e-07	2.27595e-06	0.000414429	2.57744e-10	0.00789184	0.222099	4.35924	1.58205	2.59027	4.35924	2.13199	1.58205	MEVITRRPASPPSLPRRGEFRFDDSVYATAPCSPHRRLPSLTAPPSPDPFDLLPPPSDTPRHTGANPFDLFQHFTSAPASPRRAAAIYAHFADANRDDGAHEDDKDDDEEEFQQRSSYSTAASAVPFDWEETPGTPKAGIGMGGAPAWDDADAEDTGDFEFGTVVDKAAPAESTLTTADELFEKGRIRPLKPLMKTPSDMSDKGSSSGKMMRPLKPPPGLLDGGGPSVGSSPRSPMAVLRSPRRRSRVGSGTDFDPFAAALLEASKAAPVPSLSPLGTTKEANGMVKPKTMTASKSAGWRRWRLSDLLLFRSSSEGGRINRDSVFRCSPAKANGKVGSVDDKPKMKQGGAAVADGVVGCARLSPLQRLARGLGGHSWHHGRGMAATGTKG	uncharacterized protein LOC100823331	Brachypodium distachyon	unclassified	unknown	unknown	4130.98	2347.58	5238.67	5988.43	4426.42	13528	12939.1	9467.49	9927.92	11465.6	19088.4	20149.1	17986.8	19958.9	19295.8	10840.8	8881.96	10780.3	7245.3	9437.09	9551.3	9205.04	5306.13	3948.73	7002.8
Bradi1g47140.1	0.00121529	0.00250294	0.0185032	0.000148377	0.0186622	0.032565	3.28442	2.20456	2.31937	3.28442	2.31891	2.20456	MASSTATAAAFAYLLPAAQGSSSRLPKAAAASFARLPAHSAAAVSVGAPRRRRWAPGVAYATAATEKSIYDFTVKDIDGKGISLSKFKGKPLLIVNVASQCGLTTANYTELSHLYEKYKTQGFEILAFPCNQFGFQEPGSNSQIKQFACTRFKAEFPIFDKVDVNGPNTAPIYKFLKSSAGGFLGDLVKWNFEKFLVDKNGKVVERYPPTTSPFQIEKDIQKLLAA	phospholipid hydroperoxide glutathione peroxidase 1, chloroplastic-like	Brachypodium distachyon	disease/defence	N	chloroplast	3728.34	3004.9	7095.16	5548.57	4844.24	7242.73	15613	12131.2	9955.4	11235.6	15807	16671.5	14240.8	16922.7	15910.5	14590.3	11296.1	9674.08	9373.07	11233.4	8346.31	6462.1	12674.6	15234.6	10679.4
Bradi1g50180.1	0.000573278	0.00129975	0.0399156	0.211728	0.000214432	0.00162555	10.5132	4.32635	5.93337	4.32635	10.5132	8.67697	MPKAAGDAKLLIQSLSKAYAATPTNLKIIDLYVVFAVATAVVQVVYMGVVGSFPFNSFLSGVLSCIGTAVLAVCLRIQVNKDNKEFKDLAPERAFADFVLCNLVLHLVIMNFLG	Dolichyl-diphosphooligosaccharide--protein glycosyltransferase subunit DAD1	Brachypodium distachyon	protein destination and storage	Y	PM, ER	0	463.033	604.755	1193.29	565.269	2254.27	4912.94	3182.9	3065.68	3353.95	2239.32	2160.09	2235.72	3147.08	2445.55	5005.22	9056.49	4004.62	5704.78	5942.78	3675.14	7457.83	4629.75	3856.57	4904.82
Bradi1g54030.1	0.00158784	0.0031875	0.0198117	0.00128928	0.00211755	0.408494	1.71898	1.23391	1.50435	1.71898	1.67384	1.23391	MAFFPAATATTAAAVAFTSTRCVSPRPSSPYLPRGVASSAIAARRRAAPRAAAVRFSVRAQAAKKSVLVVNTNSGGHAVIGFYFAKALLAAGHAVTVLTVGDEGSDKMKKPPFSRFSELTSAGAKTVWGDPADVGAAVGGASFDVVLDNNGKDLDAVKPVADWAKSAGVGQFLFISSAGIYTPTDEPPHVEGDAVKGSAGHVGVEKYIAAEFGSWASFRPQYMIGSGNNKDCEEWFFDRIVRKRPVPIPGSGMQLTNISHARDLGSMLTMAVESPDAAAGKIFNCVSDRAVTLDGLAKMCAAAAGAAVEIVHYDPAAAGVDAKKAFPFRNMHFYAEPRAAKEVLGWTSTTNLPEDLKERFAEYASSGRGDKAMSFDLDDKILSAVGAAPVSVAA	chloroplast stem-loop binding protein of 41 kDa	Brachypodium distachyon	unclassified	N	chloroplast	28646.7	25186.4	26075.9	35288.8	28799.5	54126	50451.3	35710.4	33009.6	43324.3	46513.2	50905.8	46815.6	53788.3	49505.7	45295	59338.3	43500.1	44689.8	48205.8	37265	31829.9	36018.7	37029.7	35535.8
Bradi1g64120.1	1.15475e-09	4.58163e-08	3.08642e-14	4.9128e-10	0.0160299	0.250114	11.3256	2.35711	11.3256	9.20461	3.47365	2.35711	MAPELSRKMTTAKAAAAAVKPATKAFVTFLAGDGDYWKGVVGLAKGLRKAGSAYPLVVAMLPDVPESHRRILASQGCILREIVPVYPPENQTQFAMAYYVINYSKLRIWEFVEYERMVYLDADIQVFDNVDELFDLPKGHFYAVMDCFCEKTWSHTPQYQIGYCQQCPDRVTWPAAEMGPPPALYFNAGMFVHEPSMATAKALLDTLRVSPTTPFAEQDFLNVFFREQYKPIPLVYNLVLAMLWRHPENVQLAKVKAVHYCAAGSKPWRFTGKEANMDREDIKVLVKKWWDIYNDESLDFKGLPADADELEAAAKKPIRAALAEAGTVKYITAPSAA	Hexosyltransferase	Brachypodium distachyon	energy	N	Golgi apparatus	7851.66	10160.9	11930.2	11618.2	10390.2	124623	134267	94506	117307	117676	90435.5	119072	83882.6	89161.8	95638	37791.2	37297.9	42676.6	26602.3	36092	29490.2	21217.4	25303.7	21952.4	24490.9
Bradi1g66590.1	0.000318819	0.000780558	0.00635248	5.12006e-05	0.0018346	0.00155266	2.33883	1.82835	1.82835	2.33883	1.95257	1.97728	MAGKGDGPAIGIDLGTTYSCVGVWQHDRVEIIANDQGNRTTPSYVAFTDTERLIGDAAKNQVAMNPINTVFDAKRLIGRRFSDASVQSDAKLWPFKVIPGPGDKPMIGVQYRGEDKQFSAEEISSMVLNKMKETAEAYLGTTIKNAVVTVPAYFNDSQRQATKDAGVISGLNVMRIINEPTAAAIAYGLDKKSTSVGEKNVLIFDLGGGTFDVSLLTIEEGIFEVKATAGDTHLGGEDFDNRMVNHFVQEFKRKNKKDISGNPRALRRLRTACERAKRTLSSTAQTTIEIDSLFEGIDFYTTITRARFEELNMDLFRKCMEPVEKCLRDAKMDKSTVHDVVLVGGSTRIPRVQQLLQDFFNGKELCKSINPDEAVAYGAAVQAAILTGEGNEKVQDLLL…	heat shock cognate 70 kDa protein-like	Brachypodium distachyon	protein destination and storage	N	nucleus	918547	791876	856673	975175	885568	2.00093e+06	1.75501e+06	1.36971e+06	1.35085e+06	1.61913e+06	2.00504e+06	2.32296e+06	1.98235e+06	1.97441e+06	2.07119e+06	2.39449e+06	1.75302e+06	1.34763e+06	1.42139e+06	1.72913e+06	1.61887e+06	1.7526e+06	1.75034e+06	1.88226e+06	1.75102e+06
Bradi1g70700.1	8.1346e-11	1.07617e-08	6.91669e-14	0	5.98088e-09	6.80698e-10	11.0099	7.39183	8.9416	11.0099	9.12894	7.39183	MGILDELSEMCLCPGIRPRRRLKKRKQMTTVEMKVRIDCEGCERKIRKAVESMEGVTGVEVVPKQNKVAVTGYVDPAKVMRRVAYKTGKRVEPWPYVPYDVVAHPYAPGAYDKKAPPGYVRNVVSDPNAAPLARASSTEVKYTSAFSDENPNAACTIM	heavy metal-associated isoprenylated plant protein 27	Brachypodium distachyon	disease/defence, signal transduction	Y	PM	70671.9	65269.2	68659.6	78935.9	70884.1	659561	660037	588730	626942	633818	759213	849490	674165	838850	780430	650317	751538	605372	581163	647097	555825	502679	512416	524933	523963
Bradi1g72320.1	0.000115663	0.000322374	0.00280384	0.00247839	4.48656e-05	0.000147332	2.27222	1.824	1.824	1.82968	2.27222	2.10974	MRVVVTGATGYLGGRLCAALAGAGHAVRAFVRRTSDASGLPAGAELAYGEVGDVDSLAAAFDGCDAVFHVAAVVEPWLPDPSVFATVNVGGLENVLKAAKRTPTVKKIIYTSSFFAVGPTDGYVADETQMHQGKTFCTEYEKSKVLADRIALQAAAEGVPITIVYPGVIYGPGKLTTGNLVSRILIERFNGRLPGYIGDGYDRESFCHVDDVVSGHVAAMEKGRVGERYLLTGENMSFMQIFNMAANITNTKAPSFHVPLWLIEIYGWISVFISCITGKLPLISYPTVHVLRHQWAYACDKAKRELGYSPRNLTEGLSEMLLWLKDDKLIKF	dihydroflavonol-4-reductase-like	Brachypodium distachyon	secondary metabolism	N	ER	5050.3	3294.56	5518.48	4484.46	4586.95	6797.12	10444	9204.09	7021.28	8366.62	7709.05	9286.1	8137.8	8437.63	8392.65	11864.3	9319.16	11206.1	9300.69	10422.6	7701.37	10808.4	10442.7	9756.61	9677.25
Bradi1g76020.1	0.036818	0.0493713	0.0323211	0.407989	0.998265	0.340927	1.64734	0.952187	1.64734	1.32626	0.952187	1.35406	MEAATMAWTAAVAGVGLVYWFVWVMGSAEVKGKRAVDLKMGSINRDNVKDKYTQYWSFFRRPKETATDEASAEKVPAFVDTFYNLVTDIYEWGWGQSFHFSPSLPGRSHRDATRVHEERVADLLKAKPGHRLLDVGCGVGGPMRAIAAHSGSNVVGITINEYQVNRARSHNRKAGLDSRCEVVCGNFMSMPFDDASFDGAYSIEATCHAPRLQDVYGEVFRVLKPGGLYVSYEWVTTALYRAEDPDHVEAIHGIERGDALPGLRRQDEIASIAKEVGFEVVQELDLALPPALPWWTRLKMGRLAYWRNSLVVRVLTILRVAPKGVVEVHEMLYETAQHLTRGGETGIFTPMHMVLLRKPSTAAAAESK	24-methylenesterol C-methyltransferase 2-like	Brachypodium distachyon	metabolism	N	unknown	6590.97	11293.7	8240.04	10885.6	9252.58	16471.2	12417.8	14935.6	17144.1	15242.2	11638.3	9681.81	13139.9	14625.3	12271.3	8509.13	8030.22	8213.9	10487.5	8810.19	15589.1	7055.01	17982.2	9488.06	12528.6
Bradi1g76330.1	0.00848604	0.013612	0.00921858	0.979586	0.0314706	0.741392	1.70895	1.08295	1.70895	1.08295	1.58636	1.18974	MDPYKHRPSSSFNGPMWSTNSGAPVWNNDNSLTVGPRGPILLEDYHLVEKIANFDRERIPERVVHARGASAKGFFEVTHDISHLTCADFLRAPGVQTPVIVRFSTVIHERGSPETLRDPRGFAIKFYTREGNWDLVGNNFPVFFIRDGMKFPDMVHSLKPNPKSHIQENWRILDFFSHHPESLHMFTFLFDDIGIPADYRHMDGSGVNTYTLVNRAGKSHYVKFHWKPTCGVKSLLDDEAVTVGGTNHSHATKDLYDSIAAGNYPEWKFYIQIIDPDHEGRFDFDPLDVTKTWPEDIIPLQPVGRLVLNRNIDNFFSENEQLAFCPGIIVPGIYYSDDKLLQTRIFSYSDTQRHRLGPNYLLLPANAPKCAHHNNHYDGTMNFMHRDEEVDYFPSRFDP…	Catalase	Brachypodium distachyon	disease/defence	N	cytosol	39826.9	44574.9	37171.7	41689.7	40815.8	62491.5	98634.1	63278.9	54603.7	69752.1	48579.6	45346.3	48710.9	34169.1	44201.5	58621.8	79458.3	53135.2	67778.1	64748.3	47051.9	56143.9	37084.9	53959.9	48560.1
Bradi2g04070.1	6.09222e-10	3.38445e-08	2.5144e-05	0	3.85675e-07	7.92127e-08	7.49208	3.38539	3.38539	7.49208	3.99921	4.3132	MGNSIYRFLCGVCSDLCSAASESAYQPHGAHAAVAALGRDILHFQRTKQVPEGLSRHVVSSQNAQANWYKKLQVAWKKARPAPTTPEDAARLVVLTLKNHQKADVEGLLAFYGLPHPNAASAAPPPPSSAAPAPAHHAGPAHKPPGVKFELHTLPVDAKAVADGDTITVYVDTSGEPGSVPGDIKKAAAERTKLRAARNYPKADALQKTMADAGYRQVPNAKGQEVLAKKYRIRLSGIDAPESAMPYGKEAKEALLKMVEGKPLTVHVYDTDRYGRSVGDIHCNGVFVQEQMLKKGFAWHYTAYDKRPELAKWQKQAQDGRKGLWASSRPQEPWEYRKAKRNGTA	probable staphylococcal-like nuclease CAN1	Brachypodium distachyon	growth/development	Y	PM, nucleus, cytosol	82479.6	78491.9	111256	86237.2	89616.2	304867	339044	277324	292310	303386	636019	804471	613295	631862	671412	353073	354163	334902	391439	358394	423518	344838	412119	365655	386533
Bradi2g09760.1	3.30817e-07	3.21501e-06	0.00161426	2.17624e-10	0.000166407	3.49737e-05	28.9659	12.166	12.166	28.9659	14.7932	18.1439	MSFLWKSSNGGTTEKTMTVEEQQQKIDELRKQLGEPSSVAIQGFLSDASILRFLRARNWNVQKASKMLKAAVKWRAAYKPEMISWEDIAHEAETGKIYRADYKDKLGRTVLVLRPGLENTTSGKEQIKYLVYSLEKAIMNLTDDQEKMVWLTDFQGWTMGSTPLKVTRETVNVLQDCYPERLGLAILYNPPRLFESFWKIVKPFLDHETYKKVKFVYSDDKESLKIMAEVFDVDKLDSAFGGRNPATFEYNSYAEQMKQDDKKMQSTDAGSDASSEASFYSGSDSPKHGSAEQVAAKNG	phosphatidylinositol transfer protein 3	Brachypodium distachyon	intracellular traffic	Y	PM	2143.91	0	484.312	0	657.055	10024.3	11073.5	5213.7	5663.33	7993.7	16469.4	23489.6	16961.8	19207.8	19032.2	8998.09	12193.7	9639.46	8048.47	9719.92	11656.5	13295.9	13541.8	9191.83	11921.5
Bradi2g12520.1	2.18064e-07	2.35334e-06	0.000237585	2.32445e-07	5.4923e-08	1.26556e-06	5.59363	3.56435	3.56435	5.2314	5.59363	5.23276	MSFSTTAAVVGGTARSDAIRPADLRFCGLRREAFGLRLLRSSPQAAAAKRMVLAAEATGNGAAGSGGFDYDLVIIGAGVGGHGAALHAVEKGLKTAIIEGDVVGGTCVNRGCVPSKALLAVSGRMRELQDEHHMKSLGLQVSSSGYDRQSVADHANNLASKIRSNLTNSMKSLGVDILTGFGTVVGKQKVRYGKVGFPDNEITARNIIIATGSVPFVPKGIEIDGKTVFTSDHALKLESVPDWIAIVGSGYIGLEFSDVYTALGSEVTFVEALDQLMPGFDPEIAKLAQRILINPRKIDYHTGVFASKITPAKDGKPVLIELIDAKTKEHKETLEVDAALIATGRAPFTKGLGLENINVVTQRGFIPVDERMQVTDADGNVVPNLYCIGDANGKLMLAH…	Dihydrolipoyl dehydrogenase	Brachypodium distachyon	energy	N	mitochondria	14070	17173.5	5438.77	9825.21	11626.9	34233.8	48536.4	36767.9	46230.8	41442.2	59792	58209.8	74090	51207.5	60824.8	69778.5	65693.5	70475.4	54198.6	65036.5	72015.2	61040	56872.7	53434.6	60840.6
Bradi2g24850.1	1.05434e-06	8.12745e-06	0.00242715	6.16068e-08	0.343805	0.35668	6.95277	2.00942	3.75169	6.95277	2.02594	2.00942	MEDVAKFLFGISGNVIALFLFLSPVPTFWRIIRKKSTEEFSGVPYNMTLLNCLLSAWYGLPFVSPNNILVSTINGAGAAIEACYVVIFLCFASSKKARLRTLGLASAVVAVFAAVALVSMLALHGPGRKLLSGLAMAVFSICMYASPLSIMRLVIRTKSVEYMPFLLSLAVFLCGTSWFVYGLLGRDPFVAVPNGCGSVLGAAQLILYAVYRNNKGKSSDGKLQGSDDVEMSVDARNNKVAHGDDAGGSQDVQQDS	bidirectional sugar transporter SWEET1b-like	Brachypodium distachyon	transporter	Y	PM	194.767	632.842	564.82	488.187	470.154	1619.74	1700.53	1325.33	2409.88	1763.87	2388.33	3596.67	4093.58	2996.91	3268.87	912.903	609.28	1051.57	1236.26	952.503	997.287	795.594	796.389	1189.67	944.735
Bradi2g27267.1	0.00396201	0.00701411	0.0106384	0.00945338	0.994256	0.767374	1.69604	1.05805	1.68537	1.69604	1.05805	1.17934	MGGCLSGDVRGGMEAVGGAGASGGRGPATAGQGQGGLNEAVDYLLQNNGLRGLYMPLELSFSASKLRNMDVLSKSDPMLVVYAKIDGKLEEIGRTEVILNSLEPSWITKATVNYQFEIVQPLVFRIYDIDTRYHNTPVKMLNLNEQDYLGEASCNLSEIVTKSNHSLTLNLRSGSQHALLGTITVHSEESSSSRTAIEMTFHCLNLDNKDMFSKSDPFLKVSRLTESSVAVPICKTEVVINNLNPVWRPITLTSQQYGSKDNPLLVECFDFDASGDHQFIGALQTTITQLQNIHNSKAGANFYSHKGQKKLKGQLFLDKFQEKVQHTFLDYISGGFELNFMVAVDFTASNGDPRTPQSLHYIDPSGRPNSYQQAILGVSEVLQFYDNDRRFPAWGFGAK…	protein BONZAI 3-like isoform 1	Brachypodium distachyon	intracellular traffic	Y	PM	89652.2	85397.5	109434	164614	112274	199996	224809	153741	178351	189224	167627	207013	212418	174629	190421	114008	82579.3	127876	150704	118792	173685	147792	111861	96302.1	132410
Bradi2g37630.1	2.39086e-08	4.35848e-07	3.45408e-06	1.37545e-10	5.91903e-10	0.000307835	7.34275	3.82629	4.74997	7.34275	6.50205	3.82629	MPTSGGHVAVDVADPASAAAAASLPPVPYVLSFTDLSYSVKKPRGPTGHLLPPRGSNRLASATDSPFPSSLTPASNTKALLSGISGSAVSGELFAIMGASGSGKSTLLDALAGRISRDSLHGAVSLNGEPLHGRRLRAISAYVMQDDLLYPMLTVRETLQFAAEFRLPRSLPKSKKRARVDALIDQLGLARAADTVIGDEAHRGVSGGERRRVSIGVDIVHDPILLFLDEPTSGLDSTSAFMVVQVLRNIAQSGSVVVMTIHQPSARILAILDKLMLLSRGRTVYAGSPAGLKPFFSEYGEPIPDNENPAEFALDTIRELERQEPHGSSPLAEFNATWQAAHSSLVVPANKAATPMSLEQAIAESVFRGKLVAGSTSSSSTTTSSPSSSVPTYANPLAI…	ABC transporter G family member 1-like	Brachypodium distachyon	transporter	Y	PM	43707.2	37226.7	67807.6	53813.3	50638.7	228442	254950	219616	259121	240532	330326	368649	403803	384532	371828	267269	271469	386681	391602	329256	203349	190943	211411	169331	193758
Bradi2g55070.1	1.05303e-05	4.48121e-05	0.00429062	4.90986e-05	0.0699486	1.02431e-05	3.56768	1.83194	2.28559	2.99988	1.83194	3.56768	MGLTLGKMMLGKIVVETPKHEVLHTGAGYEIRKYPPCVAAEVVYDPKDMKGDPDGGFQVLAAYIGVFGKPQNTKPEKIAMTSPVITSASSGPGKAEEISMTAPVITSSVEPEPVAMTAPVITADGGNNNKVTMQFLLPSKYSKAEEAPKPTDERVVLRDVGERKYGVVTFSGLAGEKVVAEKAEGLKAALEKDGHVVKGPFVLSRYNPPWTLPPLRTNEVMIPVE	heme-binding-like protein At3g10130, chloroplastic-like	Brachypodium distachyon	unclassified	N	chloroplast	54271	37385.2	44222.3	52808.9	47171.9	144329	118214	94641	74077.1	107815	120714	147795	134660	162870	141510	110224	85922.7	70143.6	79373.2	86415.9	159656	139062	205558	168902	168294
Bradi2g55150.1	4.43999e-05	0.000147615	0.00526108	0.00692606	1.17797e-05	4.05728e-05	2.54272	1.83017	1.86109	1.83017	2.54272	2.382	METVAASGYARGAATRSPACCAAMSFSQSYRPKAARPPTTFYGESVRANTARTLPGRQSKAASRAALTTRCAIGDSLEEFLTKATPDKNLIRLLICMGEAMRTIAFKVRTASCGGTACVNSFGDEQLAVDMLADKLLFEALEYSHVCKYACSEEVPELQDMGGPVDGGFSVAFDPLDGSSIVDTNFTVGTIFGVWPGDKLTGVTGGDQVAAAMGIYGPRTTFVVALKDCPGTHEFLLLDEGKWQHVKDTTTIGEGKMFSPGNLRATFDNPDYDKLVNYYVKEKYTLRYTGGMVPDVNQIIVKEKGIFTNVTSPTAKAKLRLLFEVAPLGFLIEKAGGHSSDGKQSVLDKVITVLDERTQVAYGSKNEIIRFEETLYGSSRLAAGATVGATV	sedoheptulose-1,7-bisphosphatase, chloroplastic-like	Brachypodium distachyon	energy	N	chloroplast	164688	126250	180612	277990	187385	341972	448983	338229	265778	348741	374210	325210	290940	381429	342947	530452	524552	447136	403736	476469	441818	477735	479461	386397	446353
Bradi2g55920.1	0.000112103	0.000316374	0.0198322	0.000316436	3.59506e-05	0.10083	2.56723	1.58287	1.79458	2.33022	2.56723	1.58287	MAAYEKQQPPPPPQQQQPYYAYPAPPPQPAYYAAPPRPRRSGGGPRCFVCFLFKVIAIAVIALGALTIALWLIFRPGSVRATAVSATLSRFDLPDGPAPGARELLQYNLTVDIRVRNPNRFGIRYEYLEARASYDGERFGYDPLEPFYLDGKAERTVTAAFGGSEPLDGNGALRAYRREKSDGFYYVKVRLYTDVAFRVRVFNVRRKSKISCTLRLPVPSASSAPVPTMLGTRCDVDF	NDR1/HIN1-like protein 10	Brachypodium distachyon	disease/defence	Y	PM	68316.6	58264.1	68679.2	74292.1	67388	103101	146173	110935	123523	120933	155031	186127	132407	154550	157029	228675	165317	139189	158820	173000	92961.4	93660.8	135999	104044	106666
Bradi2g59920.1	2.04081e-08	3.87754e-07	1.71118e-09	8.07379e-09	0.0629674	0.70758	2.59427	1.15584	2.59427	2.49475	1.4005	1.15584	MAQRALELTLISGKDLKDVNLLSKMEVYAVVSLSGDPRSRQRVAADRAGGRNPTWNATLRFTVPANAAGSLHVLLRAERAFGDRDVGEVHIPLSELLSGAPEGPVPVKFVAYQVRKMGSGKPQGVLNFSYKLGEVTQAAAYAGGAGQAGYAQPQSAYPPAAAYPPHSGYPPAAKADAYPPPSAYPPAGKADAYPPPSAYPPAAKADGAAAAYPPPSGYPPAGKAGESSTAYPPPSGYPPAGKPAKAGEPVTAYPAAAGPSTGAPYGAPPPQYGYGYPAQQPAGYGYPPAPPQGGYGYGYPPQQPQYGGYQQQAVKPPKKSGMGMGLGAGLLGGALGGLLIGDMISDSSSGYDAGYDAGFDDGGGFDF	protein SRC2	Brachypodium distachyon	disease/defence	Y	PM, ER, vacuole	82505.8	81691.6	128672	97069.1	97484.5	294460	239555	253032	224557	252901	220187	264167	235527	252919	243200	151201	138785	140618	115506	136527	128077	91753.7	108461	122414	112676
Bradi3g04270.1	6.63813e-06	3.13106e-05	0.0026322	6.62456e-06	0.597393	0.0234649	8.12835	2.02298	4.65735	8.12835	2.02298	3.70353	MGALDHLSHLCSMTETKEALKLRKKRPLQTVNIKIKMDCEGCERRVKSAAKSIRGVTSVAVTPKMSKLTVTGYVEPRKVLERVKSSTGKSAEMWPYVPYSLATYPYVGGAYDKKAPAGFIRSAPQAMADPSAPEVQYMNMFNDENVNACAVM	heavy metal-associated isoprenylated plant protein 20	Brachypodium distachyon	disease/defence	Y	PM	4411.12	2487.49	2731.33	1980.76	2902.68	21903.2	12941.7	9845.82	9384.43	13518.8	21280.2	18988.9	25673.8	28433	23594	4543.33	7534.14	5858.85	5551.93	5872.06	13094.2	8413.53	7945.32	13547.6	10750.2
Bradi3g13170.1	0.00356603	0.00638855	0.00144234	0.646675	0.326723	0.965541	2.38863	1.14992	2.38863	1.33958	1.50454	1.14992	MATALSSLRAPFSLFTSAAPAPSPIVAPSRVALPLTPSARAIRLRAQATYKVKLVTPEGEVEMEVPDDVYILDHFEEEGIDLPYSCRAGSCSSCAGKVISGEVDQSDQSFLDDDQMEAGWVLTCHAYPKSDLVIETHKEEELTA	ferredoxin, chloroplastic-like	Brachypodium distachyon	energy	N	chloroplast	6026	5559.01	4836.59	4097.82	5129.85	11593.8	15581	14813.6	7024.89	12253.3	9381.35	8421.52	5685.77	3998.85	6871.87	6178.48	7535.03	8458.94	8699.93	7718.09	6999.65	6950.9	4608.16	5037.08	5898.94
Bradi3g14580.1	0.0101201	0.0157644	0.0239803	0.908505	0.268916	0.77394	1.91913	0.730681	1.91913	1.19493	1.5243	0.730681	MDQLQLASPSAMATTKALFLIMVTAAALVGTTLGASYTVGGPAGSWDLKTNYTQWASARRFFPGDSLHFRYPTKEHNVLEVTKAGYDTCNTSVVSSSGGISNGSAAAVSTVIATYQTGNDIIPLVVSSGVTTRYFVCGVAGHCAAGMKLKVAVGAQPPVQCRGRGIRRRCTRPPPAAPAASSAVGGVDRSTSLWFAAVVAAGSLLLCS	lamin-like protein-like	Brachypodium distachyon	cell structure	Y	PM	15402.7	25655	15420.3	22498.2	19744	56383.7	40795.8	27181	27205.1	37891.4	20086.9	22568.8	27336.8	24378.6	23592.8	37337	21501	31296.6	30248.7	30095.8	10241	6258.45	25585.3	15621.6	14426.6
Bradi3g18220.1	0.00274027	0.00510583	0.00678115	0.0179223	0.995601	0.996265	1.70841	1.05037	1.70841	1.61477	1.05257	1.05037	MAAAAVSLLLMLLPALCMMPWPAAAVGVNWGTQLSHPLAASTMVQLLKDNGFDKVKLFDAEEEALAALRGSGIQVMVGIPNDMLAGLAASGKAAEDWVAANVSKHVSDGVDIRLVTVGNEPFLETFNGTYLNTTFPAMQSVQVALAKAGLSNRVKVTVALNADVYQSASGKPSNGDFRADILGLMLSIVSFLASNGAPFVANVYPFISLYADANFPLDYAFFQGSSSPVVDDNGVTYQNTFDASHDTLAAALSRNGFGNVSIVVGEVGWPTDGDANANLQLARQFNQGLLTRIASGKGTPLRPGSAIDAYLFSLVDEDQKSIQPGNFERHWGLFYYDGKPKYPLTLRGDGDGSFLLPARGVAYLSRRWCVLKPDADLADQKVGDSVSYACGNADCTSLG…	glucan endo-1,3-beta-glucosidase 5-like	Brachypodium distachyon	cell structure, disease/defense	Y	PM, cell wall	31708.6	57855.9	50505.5	48518.5	47147.1	107465	84208.2	76322	54191.1	80546.7	61437.1	81794	89652.9	71642.1	76131.5	46280	51234.4	50924.7	50063.6	49625.7	46676.9	42674.3	52175.8	56559.9	49521.7
Bradi3g27325.1	0.00111039	0.00230448	0.015637	0.107368	0.000148097	0.045447	1.95398	1.39495	1.56681	1.39495	1.95398	1.47391	MSPQTETKASVGFKAGVKDYRLTYYTPEYETKDTDILAAFRVSPQPGVPPEEAGAAVAAESSTGTWTTVWTDGLTSLDRYKGRCYHIEPVPGEDSQWICYVAYPLDLFEEGSVTNMFTSIVGNVFGFKALRALRLEDLRIPPTYSKTFQGPPHGIQVERDKLNKYGRPLLGCTIKPKLGLSAKHYGRACYECLCGGLDFTKDDENVKSQPFMRWRDRFVFCAEAIYKSQAETGEIKGHYLNATAGTCEEMMKRAVFARELGVPIVMHDYLTGGFTANTTLAHYCRDNGLLLHIHRAMHAVIDRQKNHGMHFRVLAKALRMSGGDHIHAGTVVGKLEGEHRARGIFFTQDWVSMPGVIPVASGGIHVWHMPALTEIFGDDSVLQFGGGTLGHPWGNAPGA…	Ribulose bisphosphate carboxylase large chain	Brachypodium distachyon	energy	N	chloroplast	3.64091e+06	3.63682e+06	3.97915e+06	5.27755e+06	4.13361e+06	6.87695e+06	7.67891e+06	6.06124e+06	5.28918e+06	6.47657e+06	5.39466e+06	5.93803e+06	5.14102e+06	6.59091e+06	5.76616e+06	7.01402e+06	1.04916e+07	7.82309e+06	6.97912e+06	8.07697e+06	5.5619e+06	6.08349e+06	6.3322e+06	6.39275e+06	6.09259e+06
Bradi3g34980.1	0.00973607	0.015219	0.00431069	0.212041	0.0103601	0.147962	2.05265	1.50634	2.05265	1.50634	1.9323	1.56263	MQAFLSSSSILANPCPRSLFPRPSTQSQLLLSSVSGARTNAAAAASARRSSGRCVATPASSSPAVAAVATDVPAKMKAWAYDEYGDTGVLKLDEAVSVPAVGDDQVLVRVAAAALNPVDSKRRMGKFKATDSPLPTVPGYDMAGVVVKVGSQVKSLKEGDEVYGHISEKVLEGPKQFGSLAEYTAVEEKLVALKPKNIDFAQAAGLPLAIETAHEGLERAGFSAGKSILVLGGAGGVGSLIIQLAKQVFGASKVAATASSPKLELLKSLGADVAIDYTKENFEDMPEKYDVVFDAVGQGDKAVKVVKEGGSVVVLTGAVTPPGFRFVVTSDGSVLAKLNPYLESGKVKPVVDPKGPFSFPQVVEAFSYLETGRATGKVVISPIP	quinone oxidoreductase-like protein At1g23740, chloroplastic-like	Brachypodium distachyon	metabolism	N	chloroplast	30829	23681.8	32826.8	59428.9	36691.6	83054.9	78814	80942.1	58449.4	75315.1	57424.8	52501.2	41894	69260.9	55270.2	62532	76039.1	59637.1	85389	70899.3	47114.8	47861.2	82595.5	51769.8	57335.3
Bradi3g36520.1	8.1041e-05	0.000241334	0.0183438	0.000343008	6.27551e-05	7.26395e-05	3.41075	2.25858	2.25858	3.01664	3.31322	3.41075	MAATPAPLSLSASALSARLRLAAPASRAASARRRGPMVVRAKIREIFMPALSSTMTEGKIVSWSAAEGDRVTKGDAVVVVESDKADMDVETFYDGIVAAVLVPAGESAPVGAPIALLAESEEDVALAVAQAQALSSGQAQQAPPPSDADAPPPPSPPPAAAAPAPVAAGRRVLPRRRLRSWPSSTGGPCQAGIQPKPKVAPPTAAAPVAAPSVRAVPQASVLPPVPGATVVPFTAMQAAVSKNMVESLSVPAFRVGYPILTDKLDELYEKVKPKGVTMTVLLAKAAAMALAQYPVVNASCRDGASFTYNSSINIAVAVAIDGGLITPVLEQADKLDIYLLSQKWKELVKKARAKQLQPNEYNSGTFTLSNLGMFGVDRFDAILPPGQGAIMAVGASKPT…	Dihydrolipoamide acetyltransferase component of pyruvate dehydrogenase complex, mitochondrial-like	Brachypodium distachyon	energy	N	mitochondria	56465.1	40302.8	46725.1	44976.6	47117.4	85040.9	118464	113833	108337	106419	142491	138793	178511	108749	142136	133527	130209	187263	173441	156110	195326	191754	133355	122389	160706
Bradi3g39750.1	0.00325979	0.0059364	0.00660463	0.539709	0.303946	0.732843	1.62734	0.836229	1.62734	1.21316	1.28421	0.836229	MDYVYGPGRNHLFVPGPVNIPDPVIRAMSRQNEDYRSPAVPALTKTLLEDVKKIFKTTTGTPFLFPTTGTGAWESALTNTLSPGDRIVSFSLGQFSLLWIDQQQRLNFQVDVVESDWGHGADLGALETKLSQDAAHTIKAVCIVHNETATGVTNDLHAVRKLLDAYRHPALLLVDGVSSICALDFRMDEWGVDVALTGSQKALSLPTGLGIVCASPRALEASKTAKSVRVFFDWKDYLKFYKMGTYWPYTPSIQLLYGLRAGLDLIFEEGLDNVIKRHTRLGTATRMAVEAWGLKNCTQKEENFSDTVTAVVVPPYIDSAEIVKHAWKRYNLSLGLGLNKVAGKVFRIGHLGNLNELQLLGCLSGVEMVLKDVGYPVKLGSGVAAAAAYLSNATPLIPS…	serine--glyoxylate aminotransferase	Brachypodium distachyon	metabolism	N	cytosol	19018.1	19414.5	20607.5	26871.1	21477.8	35635.1	45123.1	34048.2	24999.9	34951.6	31444.4	29407.3	24544	18828.1	26055.9	27095.3	25592.8	30055.9	27583.9	27582	14055.5	15817.7	19609.5	22358.7	17960.4
Bradi3g45870.2	0.000286669	0.000709571	0.00604148	0.000124197	0.00238341	0.000302673	6.68698	4.72734	4.72734	6.68698	5.18108	6.19147	MGGSNYDDDWVLPSADITVVLVGKLGYGKSATGNSILGREAFVSEYSHASVTNTCQMGSTMLKDGRTINVIDTPGLFDMSVTPEDAGKEIVKCMNMAKDGIHAVLMVFSATSRFSREDSSTIETIKVFFGEKIVDHLILVFTYGDLVGENLLKNMLSNAPEYLQKVVELCKNRVVLFDNKTKDQRIQAKQLEMLLDVVDSVSANNGGKPFSDQMLTRIKEVHEREKEVHDVMGYTEEQISELKKEIHRTRDEQLASITAMVEDKLNCTVEKLQNQLMEEQNARLEAERVALEARVRSDEEIRKLKESLKEAQRENEEFRRLAHNNKCTIL	immune-associated nucleotide-binding protein 9	Brachypodium distachyon	disease/defence	N	chloroplast, mitochondria	16.7647	58.153	74.6034	64.7956	53.5792	299.307	301.859	282.894	129.088	253.287	436.425	373.527	314.723	308.456	358.283	325.13	227.064	203.375	354.823	277.598	409.501	276.037	427.709	213.687	331.734
Bradi3g47010.1	1.03465e-06	8.02155e-06	5.89953e-05	1.66989e-06	0.645212	0.954963	3.62642	1.17724	3.19529	3.62642	1.37201	1.17724	MVSAGGHIDNGDDAVDFRGNPVDKSKTGGWLGAGLILGTELAERVCVMGISMNLVTYLVGELHLSNAKSANIVTNFMGTLNLLAIVGGFLADAKLGRYLTIAISATIAALGVSLLTVDTTVPGMRPPPCGDPRQSTQQECVPASSGQLALLYAALYTTAAGAGGLKANVSGFGSDQFDGRDPREERAMVFFFNRFYFCISLGSLFAVTVLVYVQDNVGRGVGYGVSAAAMALGVAVLLAGTAKYRYRRPQGSPLTVIGWVLWAAWKKRKLPLPADAGDLNGFHTAKVAYTDRLRCLDKAAVVDEADQLGAPPPSKQQPEQTTTSTATVTQVEEVKMVVKLLPVWSTCILFWTVYSQMTTFSVEQATRMDRRLGSFVVPAGSLSVFLFLSILLFTSLNER…	nitrate transporter 1.3-like	Brachypodium distachyon	transporter	Y	PM	13478.8	9491.93	12386.4	22244.5	14400.4	45132.7	56263.8	44063.1	38594.7	46013.6	62990.4	56591	52729.4	36577.4	52222	14263.6	21621.6	23893.4	19251.3	19757.5	20271.8	15981.7	15106.2	16451.3	16952.7
Bradi3g47690.1	0.00645497	0.0106844	0.0128713	0.00354646	0.0260298	0.40713	1.93905	1.342	1.78589	1.93905	1.70496	1.342	MASLAAASASTALLFPPSTSSSKPRLPLSTSLGFSTPARSRRAAAGAGAGSSGRRPGLLVVRAARAKFERTKPHVNIGTIGHVDHGKTTLTAALTMVLASVGGSAPKKYDEIDAAPEERARGITINTATVEYETETRHYAHVDCPGHADYVKNMITGAAQMDGAILVVSGADGPMPQTKEHILLAKQVGVPSIVVFLNKKDQVDDEELLELVDLEVRELLTAYEYNGDDVPIISGSALKALEALMATPGIKRGENEWVDGIFTLVDAVDAHIPVPQRQTDLPFLLAVEDVFSITGRGTVATGRIERGTVKVGDPVDLVGIRETRNATVTGVEMFQKTMDDAIAGDNVGLLLRGMQKEDIERGMVLAKPGSITPHTKFEAVVYVLKKEEGGRHSPFFPGY…	elongation factor Tu, chloroplastic-like	Brachypodium distachyon	protein synthesis	N	chloroplast	118460	78943.1	128950	194523	130219	238470	240075	243049	208631	232556	260582	225650	230147	293623	252501	228009	321165	183844	155057	222019	166585	182064	187218	163148	174754
Bradi3g48590.1	2.68462e-05	9.65747e-05	0.0134381	9.44395e-05	0.997245	0.988715	2.01224	0.939645	1.57346	2.01224	0.958462	0.939645	MAAATAKKSGSEMGVVLGLDVPRYMGRWYEIASFPNFFQPRDGRDTRATYELMEDGATVHVLNETWSKGKRDYIEGTAYKADPSSEEAKLKVKFYVPPILPIIPVVGDYWVLYVDPDYQYALVGEPRRKNLWILCRKTQIEEEVYEQLLEKAKEEGYDVAKLHKTPQSDPPPESDAAPADTKGSWWFKSLFGK	temperature-induced lipocalin 1	Brachypodium distachyon	disease/defence	Y	PM, chloroplast	338156	340437	499375	554637	433151	650563	853571	631290	590760	681546	736251	1.05988e+06	816420	873865	871605	487942	465179	340240	367274	415159	338566	412638	481274	395556	407008
Bradi3g49730.1	2.01918e-05	7.58454e-05	0.00423976	1.2427e-05	1.79581e-05	8.23055e-05	1.94229	1.5313	1.5313	1.94229	1.89423	1.77043	MGCGASKWKDPGSRRQGRPRSVGEMVIFLPGLRVPRTVDFSQSFGDHLDKSIVERLSALRARVVAMSMQESVVALKKPRRGSTTRHGGSGTANLLQALEEYLPVLLGLVKSSELRNKVQFVWANQEDDAEETAMTDAWYEVLSVLHLMAMVCFLQANYLLLPRSYGDGYGPRVSEESRRATVDVFLKAAGYLDCAFHQVLPQIPPEKRRELPVDIVEGNLKALSLQGLGQGVDMQLGLAIDNPKATLAVKRRLACEMIKYWQQIKDSIPELPLTDGWGKKHTLFVKWKYAEAKASAYYFHGLILDEGDTEKSDEMAISSLQASEEFLKESKKASEAFHSTPPTSRISIPFGTTKYLLDRIPRDTISKLQDNQHLYTQEGTSNTGISRMITPPPPLPDFP…	endosomal targeting BRO1-like domain-containing protein	Brachypodium distachyon	protein destination and storage	Y	PM, endosome	12253.9	10865.2	13323.1	17315.6	13439.4	21341.7	16750	20905.5	23321.8	20579.8	24698.4	28423.2	25903.1	25388.4	26103.3	22059.2	29957.1	25133.4	24680	25457.4	21609.6	23298.8	25642.6	24623.4	23793.6
Bradi3g51200.1	8.62845e-07	6.92844e-06	0.000720888	5.87002e-07	2.31065e-05	2.65029e-05	1027.29	482.684	482.684	1027.29	652.883	669.986	MEDERSTQSHQGGEADQVEVTDRGLFDKFIGKKKEEEDKKQEEVLVTGMEKVSVEEPEVKEEEHQDGEKKESLFTKLQRSSSSSSSSSDEEEEVIDDNGEVIKRKKKKGLKEKIKEKLPGHKDTETAAPTPAPPAPVVTHGGHHDDGAVAVEKIDEVKTEAPVAPEEEKKGFLEKIKEKLPGGHKKPEEAAAVPAVTHAAPAPVHAPAVPAATEEVSSPEKKGILGKIMDKLPGYHKTPGEEDKAAAGEHKTTA	dehydrin COR410-like	Brachypodium distachyon	disease/defence	Y	PM, cytosol	0	36.1246	0	60.1607	24.0713	17374.1	8570.58	8403.97	12126.6	11618.8	20260.3	21171.2	25822.4	31658.9	24728.2	17168.4	16364.4	12104.8	17225.4	15715.8	13934.5	16504.1	14349.3	19721.9	16127.4
Bradi3g56560.1	0.00111	0.00230448	0.000964222	0.807277	0.934093	0.0180695	1.88903	1.11169	1.88903	1.16096	1.11169	1.61052	MSTANQYQHIRVTKPVTGKARKLKDLMLKSDNRICADCGAPEPKWASSNIGVFLCLKCGDVHRALGADVSNVLSVSLDDWSDSDIDAMLEVGGNSYANSIYEAFLPKDHPKPKPDAPMEYRTKFIRAKYETQDFLKPSLRITSKSGFESNSGKSSDSSFSSTSRNHASEDSREFLGQLNITVVKGTQLAVRDMLTSDPYVVLTLGEQKAQTTIKPSDLNPVWNEVLNLSVPRNYGPLKLEVYDHDTFSADDIMGEAEIDLQPMITAAMAFGDPSRRSDMQIGRWFMTKDNALLSDSIVNVVSGKVKQEVHLKLQNVESGDMELELEWVRLD	ADP-ribosylation factor GTPase-activating protein AGD12	Brachypodium distachyon	intracellular traffic	N	cytosol	9995.9	3701.18	9893.38	7422.66	7753.28	15035	13152.5	16651.8	13745.3	14646.2	9899.37	7786.41	8445.78	9873.47	9001.26	6166.61	9364.43	7969.73	10976.1	8619.21	11604.3	10962.4	11598.8	15781.6	12486.8
Bradi4g00530.1	1.44693e-07	1.74704e-06	0.0184677	1.68562e-05	8.68134e-08	7.49983e-06	4.19966	1.92468	1.92468	2.88926	4.19966	3.15247	MDQGNKLRAQQEEGQELADQHNKAMGSMDMETTTKAAVFSDAVVHNYRGWKAMPYVIGNETFEKLGTIGTLSNMLVYLTTVYHMPSVTAATLLNVFSGTSNLATVVGAFVSDTYLGRYTTIAAATISSFLGMLILTLTAALHSLHPPSCPPNSTSCHGPSSSQLAALMASFFFLVIGAGGIRPCNLAFGADQFDPRTADGRRGIASFFNWYYFTFTIAMMLSATVIIYLQSSVNWALGLAVPALLMGLSCAVFFMGSRLYVRVRPEGSPFTSFAQVLVAAVRNRKLHLPAGAGGTRELLFDPPHQSKLVSKLAYTDQFPCLDKAAAMVAIASPEGEKKERNPWRLCTLQQVEEVKCLARIIPVWSSGIVYFIVLSQLGNYVVLQAAQTDRRITASSGFE…	probable peptide/nitrate transporter At5g62680-like	Brachypodium distachyon	transporter	Y	PM	288240	227879	197885	217400	232851	606414	443961	362312	379968	448164	694370	636878	663405	696416	672767	891532	814838	1.15849e+06	1.04673e+06	977896	843056	700346	723077	669742	734055
Bradi4g08030.1	1.37589e-05	5.59059e-05	0.00539997	0.0360405	1.85238e-06	0.00222456	2.42787	1.49738	1.66248	1.49738	2.42787	1.75086	MAPAMASLKSSLLLPSSPLSDFSGAALSMSTQNRRRSWQPRGARMQVAAAADSKNILVMGGTRFIGVFMSRLLVKEGHQVTLFTRGKAPVTQQLPGESDAEYAEFSSKVLHLKGDRQDFDFVKTNLSAKGFDVVYDINGREATEVAPILEALPNLEQFIYCSSAGVYLKSDLLPHFETDAVDPKSRHKGKLETESLLEKSGVNWTSIRPVYIYGPLNYNPVEEWFFHRLKAGRPIPIPGAGNQITQLGHVKDLATAFIKVLGNPAASKQVYNISGTKYVTFDGLARACAKAGGFPEPEIIHYNPKDFDFGKKKAFPFRDQHFFASVEKASKELGFTPEYDLVDGLTDSYSLDFGRGTFRKEADFTTDDMILGKKLVSV	chloroplast stem-loop binding protein of 41 kDa	Brachypodium distachyon	energy	N	chloroplast	162851	134316	163836	229007	172502	289790	345530	283951	227856	286782	262268	276888	231777	262273	258302	458539	477508	373183	366027	418814	327376	335334	264403	280996	302027
Bradi4g24367.1	7.0527e-06	3.25825e-05	0.00166869	0.129949	3.70658e-07	0.000957865	2.2718	1.33093	1.66638	1.33093	2.2718	1.7107	MASATILKSSFLPKKSEWGATRQAATPKQMTVSMVVRASAYADELVKTANTIASPGRGILAMDESNATCGKRLDSIGLENTEANRQAYRTLLVTPPGLGNYISGAILFEETLYQSTVDGKKIVDILVEQGIVPGIKVDKGLVPLVGSNDESWCQGLDGLASREAAYYQQGARFAKWRTVVSIPNGPSELAVKEAAWGLARYAAISQDNGLVPIVEPEILLDGEHGIDRTFEVAQKVWAETFYYMAQNNVLFEGILLKPSMVTPGAECKERATPEQVASYTLKLLQRRIPPSVPGIMFLSGGQSEVEATLNLNAMNQSPNPWHVSFSYARALQNTCLKTWGGRPENVAAAQEALLLRAKANSLAQLGKYTSDGEAAAAKEGMFVKNYSY	fructose-bisphosphate aldolase, chloroplastic-like	Brachypodium distachyon	energy	N	chloroplast	1.46868e+06	1.26518e+06	1.5325e+06	2.30255e+06	1.64223e+06	2.98152e+06	2.94861e+06	2.86189e+06	2.15427e+06	2.73657e+06	2.35912e+06	2.32772e+06	2.00663e+06	2.04932e+06	2.1857e+06	3.61377e+06	4.22522e+06	3.43857e+06	3.64569e+06	3.73081e+06	2.93724e+06	3.14724e+06	2.422e+06	2.73095e+06	2.80936e+06
Bradi4g30930.1	0.00234333	0.00444606	0.0495906	0.00220519	1	0.168253	9.11025	1.00324	6.12075	9.11025	1.00324	4.86128	MREYWTSLASLMGALAFLQGVLHAVFPAELRAAVARLLGRATRAFSPYCYFDVTETDGMSNNEIYDAVQLYLSSTAAPASGARLSLTRPHNASSFTFGLAASDRVADSFLGAAVTWEHVVAPRQSPGFSWRPLPEEKRRFTLRIRRGDREKLLPAYLDHILAKAQDIKRRSQDRLLYTNARGGGMDARGLPWDPVPFKHPSTFDTLAMDPDRKADIMADLRDFSNGSAFYERTGRAWKRGYLLYGPPGTGKSSMIAAMANFLGYDVYDLELTEVSSNAELRKLLMKTTSKSIIVIEDIDCSVDLTNRAAMAQPAPKPRPSITDGTADHDTTGAATGRSITLSGLLNFTDGLWSCCGSERIFVFTTNHVEKLDPALLRSGRMDMHVFMSYCSFPALKILL…	mitochondrial chaperone BCS1-B-like	Brachypodium distachyon	protein destination and storage	N	mitochondria	400.353	559.883	175.731	264.381	350.087	1893.99	4106.32	1509.47	1061.4	2142.79	2805.25	2529.18	4203.72	3219.36	3189.38	239.924	376.679	510.036	278.242	351.22	559.07	3698.56	1139.71	1410.13	1701.87
Bradi4g36137.1	4.85304e-05	0.000158341	0.0327017	1.01758e-05	0.00673702	0.000790201	3.32239	1.93318	1.93318	3.32239	2.18614	2.57009	MGCLGWFKRRKPRSRRRGSSGPATTTTSAVSTSRSDDSGAVRPVSKSTTTTTGSSTVSQRSITELYEERGHGQLRAFEFEELRAATNDFSRAQKLGEGGFGSVYKGYVRPLDAKGDRIAVAVKRLNLRGLQGHKQWLAEVQFLGVLEHPNLVKLLGYCATDGERGAQRLLVYEYMPNKSLEDHLFSRIYSPLSWNRRLQIILGAAEGLAYLHEGLELQVIYRDFKASNVLLDKDFQAKLSDFGLAREGPTEGNTHVSTAVVGTHGYAAPDYIETGHLTAKSDVWSFGVVLYEILTGRRSLDRNRPQGEQKLLEWVGQFGPDSRNFRMIMDPKLRGEYSSKAAREIAKLAQSCLVKNAKERPAMSEVIEVLRRAVQVELAAPSPGPGDKPNSAGKGKRVD…	probable serine/threonine-protein kinase PBL19	Brachypodium distachyon	signal transduction	Y	PM	3258.5	3010.24	4211.24	3601.32	3520.33	8484.52	8663.9	6520.23	3553	6805.41	12350.5	11801.3	10289.5	12342.3	11695.9	6840.1	7931.93	9060.96	6950.73	7695.93	11271.5	6970.87	7526.43	10421.4	9047.54
Bradi4g41000.1	3.54483e-06	1.9874e-05	0.00484379	1.84315e-05	1.39838e-06	1.86045e-05	4.48392	2.65293	2.65293	3.90047	4.48392	4.0542	MAGLLHLNSTLLPSASLLLRNRSGGQAVRRRRACRVEAKIREIFMPALSSTMTEGKIVAWNAAEGDRLAKGDPVVVVESDKADMDVETFYDGFLAAVLVPAGESAPVGSAIALLAESEDEIPLAQSQAASFSSSSSSSSSSSPPAPQETAAQEASPPPPPPAPVAVSAPAPPSPAAQGGARVVASPYAKKLAKELSVDLFSITGSGPAGRVVAKDVEAAAAAPAKKAVPVAAARPDVPLGSTVPFTTMQGAVSKNMLESLAVPTFRVGYTITTGALDDLYKKIKGKGVTMTALLAKATAMALVQHPVVNSSCRDGQSFTYNSSINIAVAVAIDGGLITPVLQDADKLDIYTLSRKWKELVDKARAKQLQPQEYNSGTFTLSNLGMFGVDRFDAILPPGT…	Dihydrolipoyllysine-residue acetyltransferase component of pyruvate dehydrogenase complex, mitochondrial-like	Brachypodium distachyon	energy	N	mitochondria	15199.1	22898.8	19728.4	13704	17882.6	28867.3	53936.8	54960.5	52000.5	47441.2	66902.4	80374	77104	54621.6	69750.5	68021.5	86034.9	85964.7	80715.3	80184.1	88525.1	78263.3	66729.9	56480	72499.5
Bradi4g41527.1	0.0062135	0.0103482	0.0361062	0.0762076	0.00114742	0.119713	5.49218	3.18501	3.80388	3.42764	5.49218	3.18501	MSSAAAAAPPPRRTRSRLQPSLSRKSDDPSTIAANGNGKTSPKLASPKHLPRERTVKKLRLSKALTIPEGTTVYDASRRMATRRVDAVLLTDAQGLLSGIVTDKDISTRVIAEGLRVEQTIMSKIMTRNPTYVTSDSLAIEALQKMVQGKFRHLPVVENGEVMAMLDIAKCLYDAIARLEKAAEQGSAIAAAVEGVERQLGGNFTAPYAFIETLRERMFKPSLSTIVTEGTKVAIVSPSDPVYVATQQMREFRVNSVVVTTGNTVQGIFTSKDVLMRVVSQNLSPELTLVEKVMTANPDCATLDTTILDALHIMHDGKFLHIPVLDREGQIAACLDVLQLTHAAIQLVEGGNGAANDVANSVMQRFWDSALALEPPDDEFDSRSEASLLMASEAGDGKS…	CBS domain-containing protein CBSCBSPB3-like	Brachypodium distachyon	unclassified	Y	PM	3600.65	1810.57	3250.25	3614.81	3069.07	12150.2	20993.2	6777.84	6776.24	11674.4	11475.8	13247.4	8922.73	8432.85	10519.7	8997.91	17081.7	18605.1	22738.9	16855.9	9818.5	6806.57	10868	11607	9775.02
Bradi5g04560.1	3.71527e-11	7.15986e-09	1.11022e-16	1.67644e-14	0.0116327	0.000110375	6.05084	1.99661	5.61879	6.05084	1.99661	3.13186	MGIVDVLSELCYMPRTRRHIKKRKQFQTVEMKVRIDCEGCERKVKKALDDMKGVSSVEVTAKQNKVTVTGYVDAAKVMRRVAYKTGKRVEPWPYVPYEMVAHPYAPGAYDKKAPAGYVRNVIGDPSAAPLARASSTEARYTAAFSDENPNACSVM	heavy metal-associated isoprenylated plant protein 27	Brachypodium distachyon	disease/defence	Y	PM	15568.5	17828	20261.5	18141.2	17949.8	104313	87805.4	102708	108598	100856	94089.9	106607	116355	117394	108611	27896.1	42800.3	33837.9	38820.7	35838.7	59840.2	53635.3	60557.5	50832.4	56216.3
Bradi5g10570.1	1.47637e-07	1.74704e-06	0.000101636	1.67128e-07	2.66498e-08	1.11327e-08	2.9873	2.16939	2.16939	2.79822	2.9873	2.94259	MQLYHHPYSLDSQKVRIALEEKGIDYTSYHVNPLTGKNMNVAFFRMNPSAKLPVFQNGAHVIFRAIDIIQYIDRLAVHLSGEITPVNTEVHKWMQKVDSWNPKMFTLTHTPVKYRAFVSKFKRRVLIARMAEAPDLASMYHVKLREAYETEDRLKDPDIMKQSEEDLSKLLDDVEAQLNKTKYLAGDEFSTADAMFIPILARIILLDLHEEYISCRPRVLEYHTLVKQRPSYKVVIGKYFNGWKKYRTLFRTSFFLCVRTLFRKY	glutathione S-transferase F10-like	Brachypodium distachyon	disease/defence	N	chloroplast	35061.2	33785.9	43107.1	38780.2	37683.6	89345.5	100987	71778.9	64889.6	81750.3	100437	125849	105753	89748.3	105447	110149	111834	108580	119726	112572	111535	107312	112829	111875	110888
Bradi5g10860.1	2.74244e-06	1.66646e-05	0.00796654	7.6142e-06	0.40842	0.0274869	9.2001	2.35628	4.354	9.2001	2.35628	3.7737	MEDERNTQSHQAADQVEVTDRGLFDKFIGKKKEEEDKKQEEVLVTGMEKVSVEEPEVKEEEVHQDGEKKESLFTKLQRSSSSSSSSSDEEEEVIDDNGEVIKRKKKKGLKEKIKEKLPGHKDTEGEHKTAAPTPGPPVPSHHDDDGAVVVEKIDGEVKTEAPPAPEEEKKGFLEKIKEKLPGGHKKPEDTAAVPVTHGAPAPVHTPGPAATEEVSSPEKKGILGKIMDKLPGYHKTPGEEDKAAAGEHKTTA	dehydrin COR410-like	Brachypodium distachyon	disease/defence	Y	PM, cytosol	3629.09	3293.17	5492.56	2093.15	3626.99	21810	16148.6	9017.94	16191.1	15791.9	24968.9	32359.3	34340.8	41805.8	33368.7	14387.5	6829.11	7257.7	5710.53	8546.2	8998.04	11521.8	17120.8	17108.1	13687.2
Bradi5g16320.1	7.66391e-10	3.77689e-08	1.03793e-05	3.33067e-16	1.9509e-05	2.33683e-10	3.57556	2.02965	2.02965	3.57556	2.10211	2.80985	MGCGSSRQVDGDGPRRKPGSVGDVVVFLPGLRAPRSVDFSQALAGRLDKSAVERLSALRARVVELAMQESAAALKPKRKTAARHGSTTANLLQALEDYLPVLLGLVKEGSELRHIVQFVWANQEDNAEETAMEDAWYEVLSVLQLMAMVCLLQANSLLLPRAYGDGYGPRVSEESRRATVDVFLKAAGYLDCAIRQVLPHMPSELRRQLPVDLAEGNLKALSLQALGQGVDMQLGLAIDSPKATLAVKRRLACEMVKYWHQVQESIPELPVSDGWGKKHLLFVKWKYVEAKAAAYYFHGLILDEGNSEKFHGMAIAALQASEEFLKESKRASEAFHATPPASRSPTPFGTAKYMFDKIPKDASSKVRINQDLYTQERVIGAPPPLPDFSLALTPEDYDL…	uncharacterized protein LOC100829154	Brachypodium distachyon	unclassified	N	unknown	78275.8	82123.2	97534.9	104234	90542.1	219544	199921	157308	158302	183769	303942	346734	308448	335831	323739	176617	197657	190710	196334	190329	242031	239971	277576	258059	254409
Bradi5g16730.1	0.0021484	0.0041226	0.0170093	0.00574208	0.992155	0.457356	2.22725	0.895999	2.05691	2.22725	0.895999	1.45039	MIQLLFTLLAAEAGLVLVLLFRTPARRLALLAVDRSKRGRGPIMARTVAATMFMVLGSSGYSIAKIRRREGDFAQLTPTDQVLASRHLLEASLMGYSLFLGLVIDRLHHYIRQIRTMKKSMEAVTKQSKTLEEAKLQGAEEIQGYQKKISSLNEQVQAVKHQYETKTEELKTAEANTLALRKQSEGLLTEYERLIAENEELRNKLQSMEVRFSHSDGKKNS	B-cell receptor associated-protein 31	Brachypodium distachyon	intracellular traffic	Y	PM, ER	2812.12	4379.33	5402.3	2683.64	3819.35	5445.71	8962.28	7343.35	9672.81	7856.04	7155.22	7515.59	8644.96	10710.7	8506.62	4065.85	3058.92	2639.55	3924.19	3422.13	4821.03	3120.98	9246.87	4969.3	5539.55
Bradi5g17230.1	1.23978e-05	5.1403e-05	0.00967365	0.80484	2.19044e-05	0.858736	7.15313	0.189403	4.35316	0.189403	7.15313	1.71979	MDQRALGQPAHEIEKTAPEPGPDMESEPALARAAAERAVPPWREQVTARGMVAALLIGVVYTVIVMKLSLTTGLVPTLNVSAALLAFLALRGWTHALARLGIASRPFTPQENTVVQTCAVACYTIGFGGGFGSFLLGLDKKTYEQSGVKTPGNVPGSYKEPGIGWMMGFLLSISFVGLLTLLPLRKVLVIDYKLTYPSGTATAVLINGFHTPQGDKNAKKQVRGFLKYFGISFFWSFFQWFYTGGDACGFLQFPTFGLQALKQTFSFDFSLTYVGAGMICSHLVNLSLLFGAILSWGVMWPLMSKQKGNWYPANASGSSMTGLYGYKAFLCIALLTGDGFYNFFKVIIITLKSMHERSKRGRLNRVADADSVSIDDRQRDEVFNRDNIPAWVAYSGYAV…	metal-nicotianamine transporter YSL16-like	Brachypodium distachyon	transporter	Y	PM	7587.23	2427.86	1639.28	3301.16	3738.88	20677.9	8240.01	23347.1	12838.7	16275.9	1594.2	53.0182	694.703	490.703	708.156	31559.8	19208.3	35604.1	20606.6	26744.7	8735.96	6429.74	4449.01	6105.6	6430.08
Bradi5g19680.1	3.22573e-07	3.17628e-06	0.000108679	1.6239e-08	2.90876e-07	3.21778e-05	13.4906	8.40295	8.40295	13.4906	13.2882	8.84983	MAISTLLRCLSLLAIVSLAAADSAGKSTDENPGQIRLNCGESGSATDADGRAWAGDAASKFAPSMPDAAAASASYKDPSLPSLVPYTTARVFASSSYTYSFLVRPGRAFLRLYFYPSNYGTHAASDALFGVTAGGVTLLRGFNASQTALALNYAYLVREFSVNVSATGTLNVTFIPSSSSSHYAFINGIEIVPTPDMLTSAAPVVPTLANGARPDPMPIRADTAFQTMYRLNVGGESLSPTDDSARLYRSWDNDAPYIFGAAAGVSYGKDANVTIRYPASVPRYVAPEAVYASARSMGPTAQINLNYNLTWILPVDAGFFYLVRLHFCEIQYPITKVNQRSFDVYISNETAREQMDVIAWSGGIGVPVYTDYLVVTAGSGQMDLWVALHPDVATRPVYY…	receptor-like protein kinase FERONIA-like	Brachypodium distachyon	signal transduction	Y	PM	4020.98	4885.17	2173.47	3038.24	3529.47	37798.3	28054	24503.3	28276.1	29657.9	56163.2	45296.4	46554.7	42444.1	47614.6	56522.3	45071.6	46406.6	39600.9	46900.4	35739.8	20740.1	40875.7	27585.2	31235.2
Bradi5g26610.1	5.02508e-08	7.28907e-07	0.00446143	3.38793e-07	1.62891e-08	1.65365e-06	2.52729	1.50506	1.50506	2.11286	2.52729	2.029	MGSASRAVSCLCCPCKCLACGLFSCLCSILVSLLVTAGVLALILYFIFRPHMIAATVDSAALTQFALAPNSALSYNLTVAMTVRNPNKRVGLYYDGVEALALFEGQRFGYAPLDSFSQGTDAVTELKPGFHGQQPVQGDVTAANFRAQQSAGAFDVEVKLNAKLRVKVWAFKVPGPRARISCPISVPAPGNASAPAFQPTGCKVWF	NDR1/HIN1-like protein 2	Brachypodium distachyon	disease/defence	Y	PM	522075	566519	566452	614679	567431	912153	924780	842182	736963	854020	1.13766e+06	1.17881e+06	1.35148e+06	1.12767e+06	1.19891e+06	1.30895e+06	1.5944e+06	1.45789e+06	1.37502e+06	1.43407e+06	1.16747e+06	1.30932e+06	1.14668e+06	981811	1.15132e+06
Bradi5g26740.1	5.42718e-06	2.70157e-05	2.52353e-05	8.02634e-08	0.00028819	0.000373244	9.32198	5.91123	7.34071	9.32198	6.0121	5.91123	MAEEDLTTLTAQLKAAAAAFPSRRAVAVPGKADLTHAALDALVDAAAARLAARAGVRLGHTVALCFPNTVELVIMFLAVIRARAVAAPLNPAYTQEEFEFYLSDSGAGLLLTDLSAANPAAEAAAAKLNLPHSAASLQSSSSPSISLTNLPEDNTTDITAGDEKLLGPNEASDVALFLHTSGTTSRPKGVPLTQRNLAATVRNIRAVYKLTESDATVVVLPLFHVHGLLCSLLSSLASGAAVTLPAGGRFSASTFWANMRGAGATWYTAVPTIHQIILDRHVSRPDPEPLPSLRFIRSCSASLAPAIMSKLETSFKAPVLEAYAMTEASHMMTTNPLPCDGAHKPGSVGLPAGDMELAILSDSGALLPAGTPGEVCIRGANVTAGYSSRTADSTSANAE…	peroxisomal-coenzyme A synthetase-like	Brachypodium distachyon	metabolism	N	chloroplast, apoplast	6430.42	5087.1	6310.51	3257.43	5271.36	52066.4	42391.7	25816.5	34507.5	38695.5	48592.7	53912.2	44441.9	49611.4	49139.6	43044.2	33941.8	20604.9	29177	31692	28374.6	26148.7	34822.3	35295.4	31160.2
